# Supplementary material for: A Simple CO2 Generating System Incorporated with CDC Light Trap for Sampling Mosquito Vectors
Source: MDPI journal article supplement (doi:10.3390/insects13070637), 2022-07-15
Supplement: s1 [file s1]

## Supplementary Materials

**Table S1.** Latin square rotation scheme adopted for evaluating three mosquito trap sets in each village.

| Day | Site 1                                                     | Site 2                                                     | Site 3                                                     |
|-----|------------------------------------------------------------|------------------------------------------------------------|------------------------------------------------------------|
| 1   | Light trap                                                 | Light trap with dry ice                                    | Light trap with CO <sub>2</sub> from the chemical reaction |
| 2   | Light trap with CO <sub>2</sub> from the chemical reaction | Light trap                                                 | Light trap with dry ice                                    |
| 3   | Light trap with dry ice                                    | Light trap with CO <sub>2</sub> from the chemical reaction | Light trap                                                 |

**Table S2.** Comparison of the number of mosquitoes obtained from each study location.

| Trap                                      | Number of mosquito/trap night (Mean ± S.E.) |                             |                           |
|-------------------------------------------|---------------------------------------------|-----------------------------|---------------------------|
|                                           | Ban Pa Chi                                  | Ban Hua Rin                 | Ban Pa Oi                 |
| Light trap <sup>1</sup>                   | 1.10 ± 0.59 <sup>a</sup>                    | 0.11 ± 0.11 <sup>a</sup>    | 0.11 ± 0.11 <sup>a</sup>  |
| Light trap + dry ice <sup>2</sup>         | 61.0 ± 10.00 <sup>a</sup>                   | 74.00 ± 21.00 <sup>a</sup>  | 13.00 ± 2.90 <sup>b</sup> |
| Light trap + limestone + HCl <sup>2</sup> | 18.00 ± 7.30 <sup>a</sup>                   | 10.00 ± 2.90 <sup>a,b</sup> | 1.90 ± 0.54 <sup>b</sup>  |
| All trap sets <sup>2</sup>                | 27.00 ± 6.40 <sup>a</sup>                   | 28.00 ± 9.40 <sup>a</sup>   | 5.10 ± 1.50 <sup>b</sup>  |

The same superscript letters in each row indicate no significant difference (p-value > 0.05).

<sup>1</sup> Kruskal-Wallis test, followed by Dunn's multiple comparison test

<sup>2</sup> ANOVA, followed by Bonferroni's multiple comparison test

**Table S3.** Meteorological information in the study locations during the study period.

| Study duration         | Location    | Average temperature (°C)<br>(Min – Max) | Average humidity (%)<br>(Min – Max) | Accumulative rainfall (mm.) <sup>1</sup> |
|------------------------|-------------|-----------------------------------------|-------------------------------------|------------------------------------------|
| June -July 2020        | Ban Pa Chi  | 27.4 (24 – 33)                          | 77.0 (48 – 93)                      | 1.8                                      |
| August -September 2020 | Ban Hua Rin | 26.6 (23 – 31)                          | 80.2 (65 -95)                       | 14.8                                     |
| October -November 2020 | Ban Pa Oi   | 25.2 (17 – 31)                          | 75.3 (51 – 91)                      | 168.2                                    |

<sup>1</sup> Source: rain fall (<http://hydromet.tmd.go.th/Reports/report-rf-province-month.as>)
